# Supplementary material for: Ultrafast Hydro-Micromechanical Synthesis of Calcium Zincate: Structural and Morphological Characterizations
Source: Hindawi journal article supplement (doi:10.1155/2017/7369397), 2017-01-01

**Supporting informations**

**S.I.1.** Example of thickness measurement of HCS and HTS synthesized calcium zincate


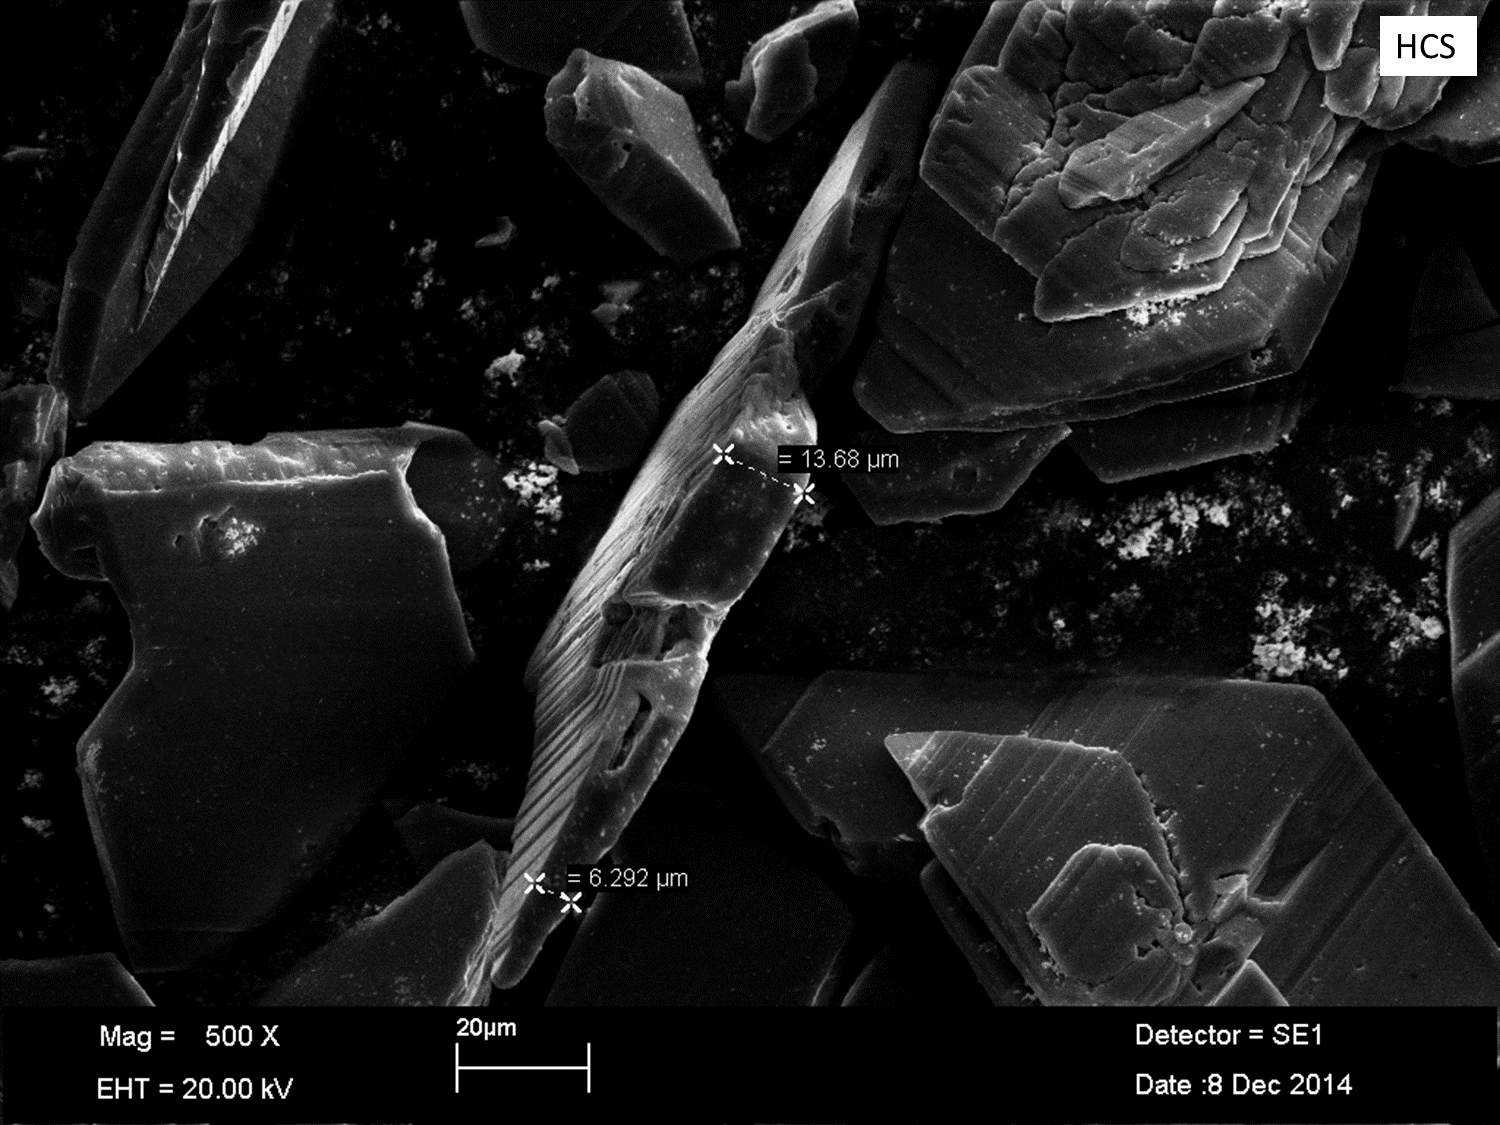


**
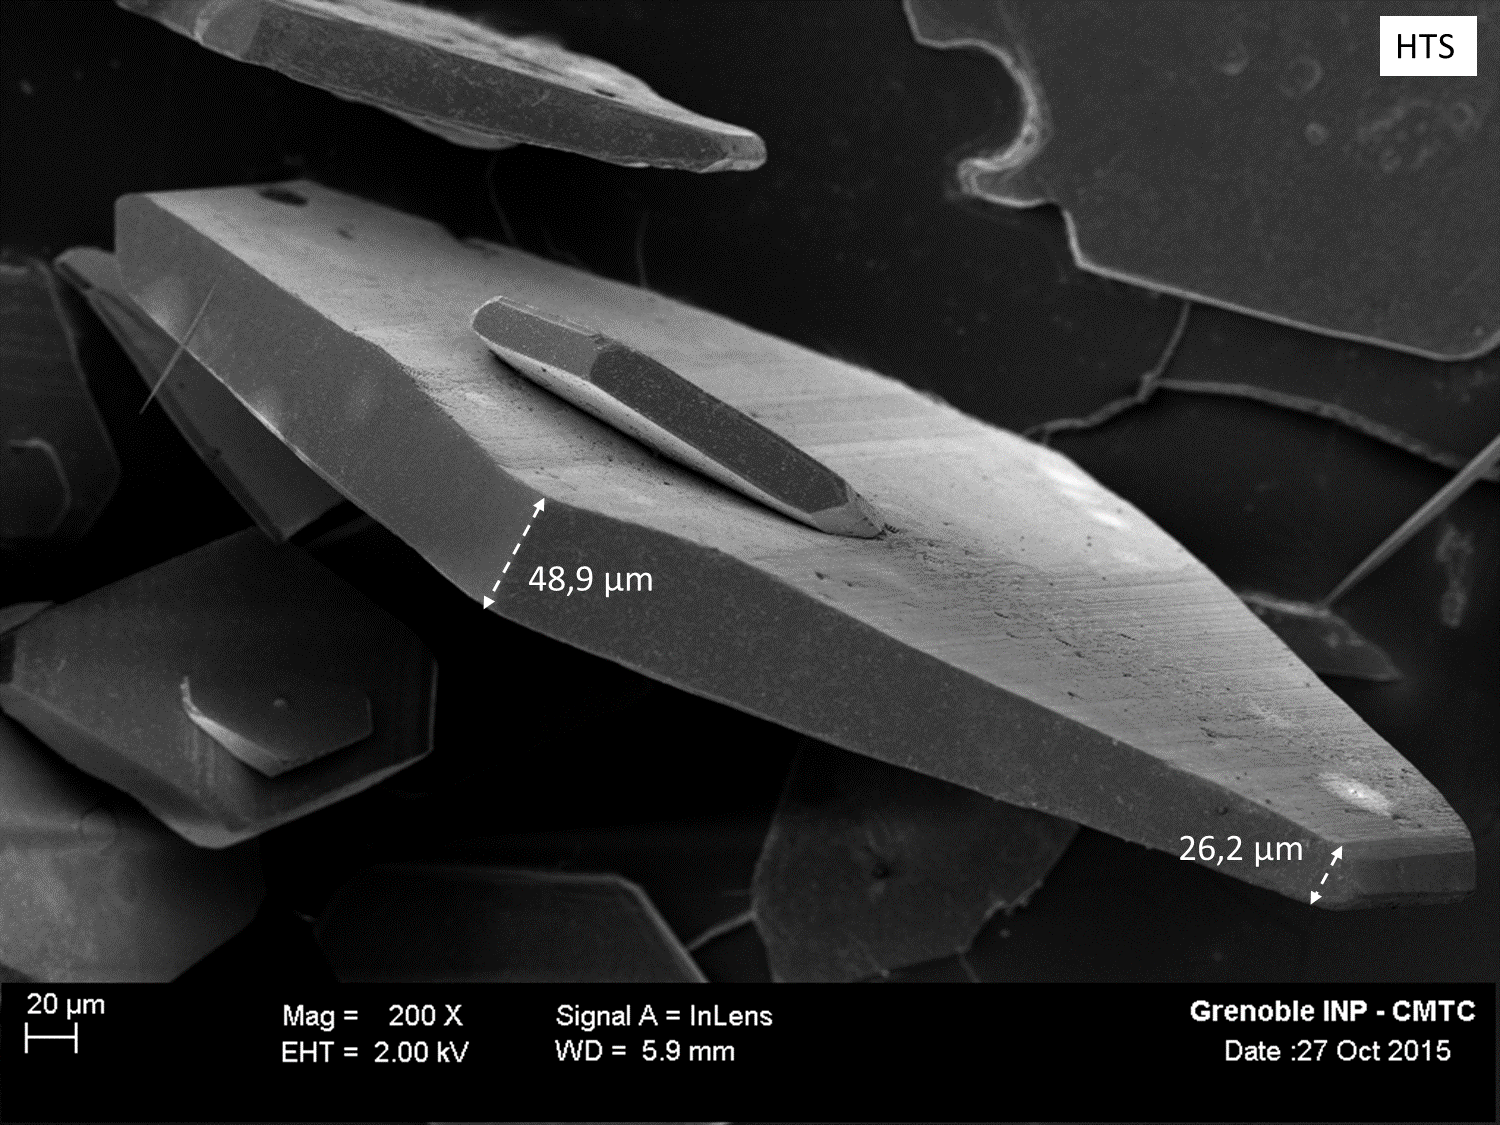
**

**S.I.2.** Backscattered image and XEDS elemental mapping (Zn in red and Ca in green) of calcium zincate surface with ZnO particles observed


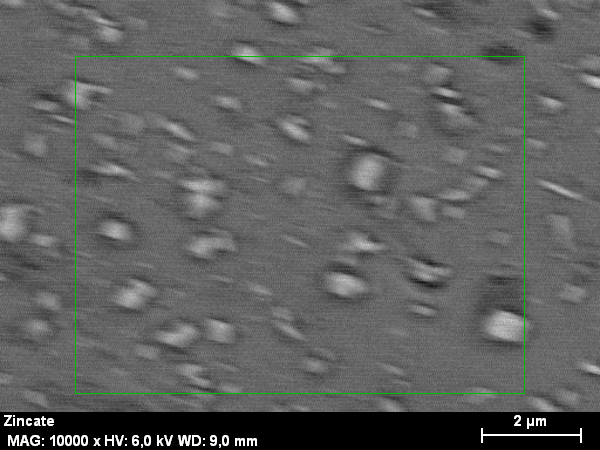

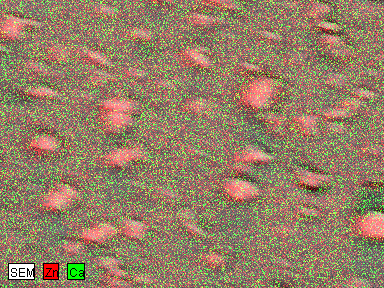


**S.I.3.** Example of thickness measurement of HMMS synthesized calcium zincate


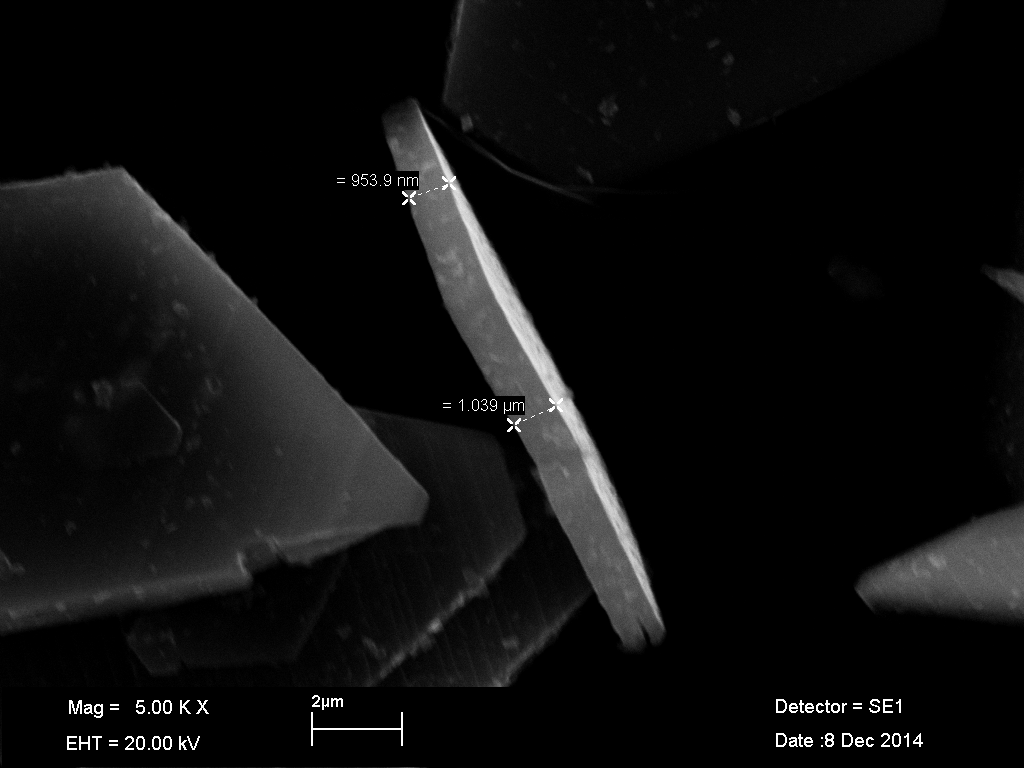

Supplement: f1 [file 7369397.f1.docx]
